# Supplementary material for: Activity and thermal stability of lysozyme in alkylammonium formate ionic liquids—influence of cation modification
Source: Royal Society of Chemistry journal article supplement (doi:10.1039/b900021f), 2009-01-01
Supplement: b900021f.pdf [file b900021f.pdf]

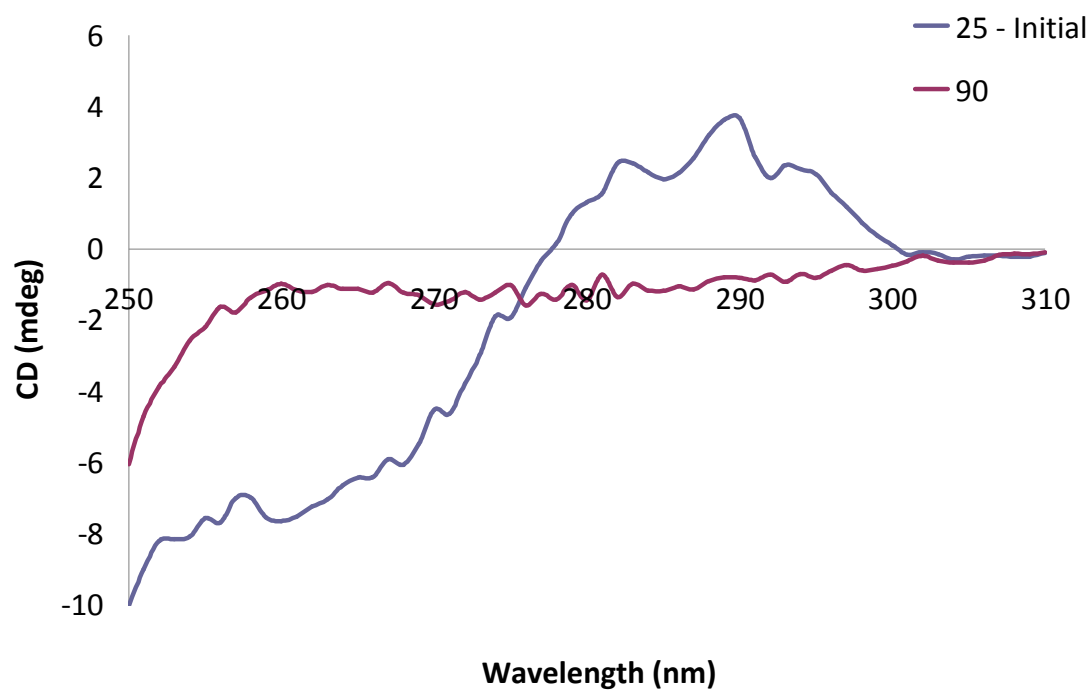

**Supplementary Fig. A.** Near UV CD spectrum of aqueous lysozyme ( $3.4 \times 10^{-4}$  mol.dm<sup>-3</sup>) in buffered water at 25 °C and 90 °C.
